1 **The inhaled steroid ciclesonide blocks SARS-CoV-2 RNA replication by targeting viral**  
2 **replication-transcription complex in culture cells**

3

4 Shutoku Matsuyama<sup>a#</sup>, Miyuki Kawase<sup>a</sup>, Naganori Nao<sup>a</sup>, Kazuya Shirato<sup>a</sup>, Makoto Ujike<sup>b</sup>, Wataru  
5 Kamitani<sup>c</sup>, Masayuki Shimojima<sup>d</sup>, and Shuetsu Fukushi<sup>d</sup>

6

7 <sup>a</sup>Department of Virology III, National Institute of Infectious Diseases, Tokyo, Japan

8 <sup>b</sup>Faculty of Veterinary Medicine, Nippon Veterinary and Life Science University, Tokyo, Japan

9 <sup>c</sup>Department of Infectious Diseases and Host Defense, Gunma University Graduate School of  
10 Medicine, Gunma, Japan

11 <sup>d</sup>Department of Virology I, National Institute of Infectious Diseases, Tokyo, Japan.

12

13 Running Head: Ciclesonide blocks SARS-CoV-2 replication

14

15 #Address correspondence to Shutoku Matsuyama, [matuyama@nih.go.jp](mailto:matuyama@nih.go.jp)

16

17 Word count: Abstract 149, Text 3,016

18 **Abstract**

19 We screened steroid compounds to obtain a drug expected to block host inflammatory responses and  
20 MERS-CoV replication. Ciclesonide, an inhaled corticosteroid, suppressed replication of MERS-CoV  
21 and other coronaviruses, including SARS-CoV-2, the cause of COVID-19, in cultured cells. The  
22 effective concentration (EC<sub>90</sub>) of ciclesonide for SARS-CoV-2 in differentiated human bronchial  
23 tracheal epithelial cells was 0.55 μM. Ciclesonide inhibited formation of double membrane vesicles,  
24 which anchor the viral replication-transcription complex in cells. Eight consecutive passages of 43  
25 SARS-CoV-2 isolates in the presence of ciclesonide generated 15 resistant mutants harboring single  
26 amino acid substitutions in non-structural protein 3 (nsp3) or nsp4. Of note, ciclesonide still  
27 suppressed replication of all these mutants by 90% or more, suggesting that these mutants cannot  
28 completely overcome ciclesonide blockade. These observations indicate that the suppressive effect of  
29 ciclesonide on viral replication is specific to coronaviruses, highlighting it as a candidate drug for the  
30 treatment of COVID-19 patients.

31

32 **Importance**

33 The outbreak of SARS-CoV-2, the cause of COVID-19, is ongoing. To identify the effective antiviral  
34 agents to combat the disease is urgently needed. In the present study, we found that an inhaled  
35 corticosteroid, ciclesonide suppresses replication of coronaviruses, including beta-coronaviruses  
36 (MHV-2, MERS-CoV, SARS-CoV, and SARS-CoV-2) and an alpha-coronavirus (HCoV-229E) in  
37 cultured cells. The inhaled ciclesonide is safe; indeed, it can be administered to infants at high  
38 concentrations. Thus, ciclesonide is expected to be a broad-spectrum antiviral drug that is effective  
39 against many members of the coronavirus family. It could be prescribed for the treatment of MERS,  
40 and COVID-19.

41

42 **Introduction**

43 The COVID-19 outbreak began in December 2019 in Wuhan, China(1). The causative virus, severe  
44 acute respiratory syndrome coronavirus 2 (SARS-CoV-2), spread rapidly worldwide and was declared

45 a global health emergency by the World Health Organization. Thus, effective antiviral agents to  
46 combat the disease are urgently needed. Several drugs are effective against SARS-CoV-2 in cultured  
47 cells(2–4). Of these, Remdesivir has undergone clinical trials in COVID-19 patients, with both  
48 positive and negative results (5, 6). Lopinavir/ritonavir and chloroquine/hydroxychloroquine are of no  
49 benefit (7, 8).

50 The virus can have inflammatory effects; therefore, steroids are used to treat severe inflammation,  
51 with beneficial effects in some cases. For example, high-dose steroids reduce symptoms in those with  
52 influenza encephalopathy(9). It would be highly beneficial if a virus-specific inhibitor was identified  
53 among the many steroid compounds that have been well characterized. However, systemic treatment  
54 with steroids is contraindicated in cases of severe pneumonia caused by Middle East respiratory  
55 syndrome coronavirus (MERS-CoV) or severe acute respiratory syndrome coronavirus (SARS-CoV);  
56 this is because steroids suppress innate and adaptive immune responses(10, 11), resulting in increased  
57 viral replication. In fact, for SARS (2003) and MERS (2013), systemic treatment with cortisone or  
58 prednisolone is associated with increased mortality(12, 13). Therefore, if steroid compounds are to be  
59 used to treat patients suffering from COVID-19, their tendency to increase virus replication must be  
60 abrogated. Here, we reconsidered the use of steroids for treatment of pneumonia caused by  
61 coronavirus.

62 In the preprint of this study (posted in BioRxiv)(14), we showed that a corticosteroid, ciclesonide, is a  
63 potent blocker of SARS-CoV-2 replication. Based on the data in our preprint study, clinical trials of a  
64 retrospective cohort study to treat COVID-19 patients were started in Japanese hospital in March  
65 2020. The treatment regime involves inhalation of 400 µg ciclesonide (two or three times per day) for  
66 2 weeks. Three cases of COVID-19 pneumonia treated successfully with ciclesonide have been  
67 reported(15), as have several case reports(16–18). None of these studies reported significant side  
68 effects. The aim of the present study is to outline the scientific rationale for conducting these clinical  
69 trials.

70

71

72 **Results**

73 **Antiviral effect of steroid compounds on MERS-CoV**

74 The 92 steroid compounds chosen from the Prestwick Chemical Library were examined to assess the  
75 inhibitory effects of MERS-CoV-induced cytopathic effects. Vero cells treated with steroid  
76 compounds were infected with MERS-CoV at an MOI = 0.1 and then incubated for 3 days. Four  
77 steroid compounds, ciclesonide, mometasone furoate, mifepristone, and algestone acetophenide,  
78 conferred a > 95% cell survival rate (Fig. 1). Interestingly, a structural feature of these compounds is a  
79 five- or six-membered monocycle attached to the steroid core.

80

81 Next, we assessed the ability of eight steroid compounds (denoted by arrows in Fig. 1) to suppress  
82 both growth of MERS-CoV and virus-mediated cytotoxicity in Vero cells over a range of drug  
83 concentrations (0.1–100  $\mu$ M). Ciclesonide exhibited low cytotoxicity and potent suppression of viral  
84 growth (Fig. 2a). Algestone acetophenide, mometasone, and mifepristone also suppressed viral  
85 growth; however, at 10  $\mu$ M, the percentage viability of cells treated with algestone acetophenide and  
86 mometasone was lower than that of cells treated with ciclesonide, and the ability of mifepristone and  
87 mometasone to suppress viral growth was lower than that of ciclesonide. Cortisone and prednisolone,  
88 which are commonly used for systemic steroid therapy, dexamethasone, which has strong  
89 immunosuppressant effects, and fluticasone, a common inhaled steroid drug, did not suppress viral  
90 growth (Fig. 2a). A time-of-addition assay to compare the viral inhibition efficacies of the steroids  
91 with those of E64d, a cathepsin-dependent virus entry inhibitor, and lopinavir, a viral 3CL protease  
92 inhibitor, previously reported for SARS-CoV(19, 20), demonstrated that ciclesonide functions at the  
93 post-virus entry stage (Supplemental Fig. S1).

94

95 The antiviral effects of mometasone and ciclesonide against various viral species were tested by  
96 quantifying propagated virus in the culture medium of infected cells. Ciclesonide and mometasone  
97 suppressed replication of MHV-2, MERS-CoV, SARS-CoV, HCoV-229E, and SARS-CoV-2 (all of  
98 which have a positive strand RNA genome), but did not affect replication of respiratory syncytial

99 virus (RSV) or influenza virus (which have a negative strand RNA genome) (Fig. 2b). In addition,  
100 ciclesonide slightly, but significantly, inhibited replication of rubella virus (which has a positive strand  
101 RNA genome) (Fig. 2b).

102

### 103 **Target of ciclesonide during MERS-CoV replication**

104 In an attempt to identify a druggable target for viral replication, we performed 11 consecutive  
105 passages of MERS-CoV in the presence of 40  $\mu$ M ciclesonide or 40  $\mu$ M mometasone. A mutant virus  
106 displaying resistance to ciclesonide (but no virus displaying resistance to mometasone) was generated.  
107 Viral replication in the presence of ciclesonide was confirmed by measuring the virus titer in the  
108 culture medium of infected Vero cells at 24 h post-infection (hpi) and the amount of viral RNA in  
109 infected cells at 6 hpi (Fig. 3a and 3b). Next-generation sequencing revealed that an amino acid  
110 substitution at A25V (C19647T in the reference sequence NC\_019843.3) in non-structural protein 15  
111 (NSP15), a coronavirus endoribonuclease (21–23), was predicted to cause resistance to ciclesonide.  
112 Subsequently, a recombinant virus carrying the A25V amino acid substitution in nsp15 (Re-Nsp15-  
113 A25V) was generated from the parental MERS-CoV/EMC strain (Re-EMC/MERS) using a bacterial  
114 artificial chromosome (BAC) reverse genetics system(24). The titer of recombinant virus in the  
115 culture medium of infected Vero cells at 24 hpi, and the amount of viral RNA in the cells at 6 hpi,  
116 were quantified. As expected, the Re-Nsp15-A25V strain was much less susceptible to ciclesonide  
117 than the parental strain (Fig. 3c and 3d).

118

### 119 **Antiviral effect of steroid compounds on SARS-CoV-2**

120 In response to the global outbreak of COVID-19, our study target changed from MERS-CoV to  
121 SARS-CoV-2. We evaluated the inhibitory effects of ciclesonide on replication of the latter. First, the  
122 effective concentration of ciclesonide required to inhibit virus propagation was assessed by  
123 quantifying the virus titer in the supernatant of VeroE6/*TMPRSS2* cells at 24 hpi (Fig. 4a and 4b); this  
124 cell line is highly susceptible to SARS-CoV-2(25). We also examined human bronchial epithelial  
125 Calu-3 cells (Fig. 4c and 4d). Ciclesonide blocked SARS-CoV-2 replication in a concentration-

126 dependent manner ( $EC_{90} = 5.1 \mu\text{M}$  in VeroE6/*TMPRSS2* cells;  $EC_{90} = 6.0 \mu\text{M}$  in Calu-3 cells).  
127 In addition, differentiated primary human bronchial tracheal epithelial (HBTE) cells at an air-liquid  
128 interface (ALI) (HBTE/ALI cells) were prepared and SARS-CoV-2 replication was evaluated in the  
129 presence of ciclesonide. At 3 days post-infection, real-time PCR revealed a 2,000-fold increase in the  
130 amount of viral RNA in cells (Fig. 4e); ciclesonide suppressed replication of viral RNA at a low  
131 concentration (Fig. 4f) ( $EC_{90} = 0.55 \mu\text{M}$  in HBTE/ALI cells). The amount of viral RNA detected  
132 in the liquid phase was low, indicating that less virus is secreted via the basolateral surface (Fig. 4f).  
133 To assess the effect of ciclesonide at the early stage of SARS-CoV-2 replication, we measured the  
134 amount of viral RNA in VeroE6/*TMPRSS2* cells over time. The quantitative level of RNA replication  
135 was observed at 6 h post-infection (Fig. 5a). Nelfinavir and lopinavir, strong inhibitors of SARS-CoV-  
136 2 RNA replication (4, 26), were used for comparison. At 6 hpi with SARS-CoV-2 (MOI = 1),  
137 mometasone and ciclesonide suppressed viral RNA replication with an efficacy similar to that of  
138 nelfinavir and lopinavir; however, fluticasone and dexamethasone did not suppress replication (Fig.  
139 5b).

140

#### 141 **Target of ciclesonide during SARS-CoV-2 replication**

142 To identify the molecule targeted by ciclesonide to suppress viral RNA replication, we used 43 SARS-  
143 CoV-2 isolates from infected patients to generate ciclesonide escape mutants. Consecutive passage of  
144 these isolates in VeroE6/*TMPRSS2* cells in the presence of  $40 \mu\text{M}$  ciclesonide. After eight passages,  
145 three viral plaques from each passage of the 43 cell supernatants were isolated in a limiting dilution  
146 assay; the viral RNA was then isolated for next-generation sequencing. We obtained 15 isolates  
147 harboring a single mutation in the viral genome when compared with that of the parental virus (Table  
148 1). We examined replication of these mutants in the presence of ciclesonide. First, one of these  
149 isolates was tested in VeroE6/*TMPRSS2* cells. At 6 hpi, the amount of viral RNA derived from the  
150 parental virus fell by 1000-fold in the presence of ciclesonide; by contrast, the amount of RNA  
151 derived from the escape mutant increased 50-fold compared with that of the parent virus (Fig. S2).  
152 There was no difference between the parental virus and the escape mutant in the presence of other

153 steroid compounds (i.e., cortisone and algestone acetophenide) (Fig. S2). Furthermore, when we tested  
154 all 15 mutants in the presence of ciclesonide, we found a 6- to 50-fold increase in the amount of  
155 mutant viral RNA compared with that of the parental virus (Fig. 6a). Importantly, ciclesonide  
156 suppressed replication of all escape mutants by 90% or more, suggesting that these mutants cannot  
157 completely overcome ciclesonide blockade. Mutations in the ciclesonide escape mutants were  
158 identified at three positions in nsp3 and at one position in nsp4 (Fig. 6b). Of note, the amino acid  
159 substitution N1543K in nsp3 was caused by a different base change (T7348G and T7348A) (Table 1).  
160 Nsp3 and nsp4 are involved in formation of double membrane vesicles (DMV), which anchor the  
161 coronavirus replication-transcription complex within cells (27, 28). In VeroE6/*TMPRSS2* cells, DMVs  
162 were observed at 5 hpi using an anti-SARS-CoV nsp3 antibody and an anti-double strand RNA  
163 antibody (Fig. 7). The fluorescence intensity of these molecules fell in the presence of ciclesonide in a  
164 concentration-dependent manner (Fig. 7).

165

166

## 167 **Discussion**

168 Inhaled ciclesonide is safe; indeed, it can be administered to infants at high concentrations. Because it  
169 remains primarily in the lung tissue and does not enter the bloodstream to any significant degree(29),  
170 its immunosuppressive effects are weaker than those of cortisone and prednisolone(29, 30). The data  
171 presented herein suggest that inhaled ciclesonide has the potential to reduce both viral replication and  
172 inflammation in the lungs.

173

174 We found that ciclesonide suppresses replication of coronaviruses, including beta-coronaviruses  
175 (MHV-2, MERS-CoV, SARS-CoV, and SARS-CoV-2) and alpha-coronaviruses (HCoV-229E) in  
176 cultured cells. Thus, ciclesonide is expected to be a broad-spectrum antiviral drug that is effective  
177 against many members of the coronavirus family. It could be prescribed for the treatment of common  
178 colds, MERS, and COVID-19. The concentration of ciclesonide that effectively reduced replication of  
179 SARS-CoV-2 in differentiated HBTE cells was 10-fold lower than that required to suppress

180 replication in VeroE6/*TMPRSS2* or Calu-3 cells (Fig. 4b, 4d and 4f). It is speculated that ciclesonide is  
181 a prodrug that is metabolized in lung tissue to yield the active form (31); therefore, it may be  
182 converted into its active form in differentiated HBTE cells. Furthermore, this study predicts the  
183 occurrence of ciclesonide escape mutants in patients treated with ciclesonide; however, the drug  
184 suppresses replication of these mutants by >90% (Fig. 6a). Until now, the mutations identified in these  
185 mutants have not been detected in SARS-CoV-2 sequences posted in the GISAID and NCBI  
186 databases.

187

188 A ciclesonide escape mutant of MERS-CoV harbored an amino acid substitution at the dimerization  
189 site of the NSP15 homo-hexamer(32)(32)(32). Nsp15 is an uridylylate-specific endoribonuclease, an  
190 RNA endonuclease, which plays a critical role in coronavirus replication(32, 33). Recently, an *in*  
191 *silico* study suggested direct interaction between ciclesonide and nsp15 of SARS-CoV-2(34).  
192 However, we did not identify mutations in nsp15 of the ciclesonide escape mutants of SARS-CoV-2;  
193 rather, we identified mutations in the C-terminal cytosolic region (next to the transmembrane domain  
194 or within the Y1&CoV-Y domain) of nsp3 or in the large luminal loop of nsp4 (Fig. 6b). Nsp3  
195 contains a papain-like protease and, due to the large number of interactions with other nsps (including  
196 nsp4 and nsp15), is believed to be part of the central scaffolding protein of the replication-  
197 transcription complex (33, 35, 36). In addition, like coronavirus DMV, the rubella virus (which has a  
198 positive strand RNA genome and forms a spherule-like structure in cells) was slightly suppressed by  
199 ciclesonide, suggesting that ciclesonide may interact with the replication-transcription complex, a  
200 structure common to rubella and coronavirus. It is difficult to identify the mechanism by which  
201 ciclesonide targets the nsps complex because little is known about the construction and interaction of  
202 nsps in the replication-transcription complex. The result in Figure 7 was unable to be ascertain  
203 whether DMV formation or RNA replication was inhibited first by ciclesonide. We anticipate that  
204 further experiments using mutant nsps may reveal the molecular mechanism underlying the antiviral  
205 effect of ciclesonide.

206



207

## 208 **Materials and Methods**

209 **Cells and viruses.** Hep-2, HeLa229, MDCK, Calu-3, Vero, Vero/*TMPRSS2* and VeroE6/*TMPRSS2*  
210 cells were maintained in Dulbecco's modified Eagle medium high glucose (DMEM, Sigma-Aldrich,  
211 USA), and DBT cells were maintained in DMEM (Nissui, Japan), supplemented with 5% fetal bovine  
212 serum (Gibco-BRL, USA). MERS-CoV and SARS-CoV-2 were propagated in Vero and  
213 VeroE6/*TMPRSS2* cells, respectively. HBTE cells (KH-4099; Lifeline cell technology, USA) were  
214 plated on 6.5-mm-diameter Transwell permeable supports (3470; Corning, USA), and human airway  
215 epithelium cultures were generated by growing the cells at an air-liquid interface for 3 weeks,  
216 resulting in well-differentiated, polarized cultures. For treatment of HBTE cells in the experiments,  
217 ciclesonide was mixed in liquid phase medium at the indicated concentrations and virus was  
218 inoculated onto the air-phase.

219

220 **Steroids and inhibitors.** The following compounds were used: cortisone, prednisolone, fluticasone,  
221 dexamethasone, algestone acetophenide, mifepristone, mometasone furoate, ciclesonide (all from the  
222 Prestwick Chemical Library; PerkinElmer, USA), E64d (330005; Calbiochem, USA); nelfinavir  
223 (B1122; ApexBio, USA); and lopinavir (SML1222; Sigma-Aldrich).

224

225 **Quantification of viral RNA.** Confluent cells in 96-well plates were inoculated with virus in the  
226 presence of steroid compounds. Cellular RNA was isolated at 6 hpi using the CellAmp Direct RNA  
227 Prep Kit (3732; Takara, Japan). The RNA was then diluted in water and boiled. Culture medium was  
228 collected at the indicated time points, diluted 10-fold in water, and then boiled. Real-time PCR assays  
229 to measure the amount of coronavirus RNA were performed using a MyGo Pro instrument (IT-IS Life  
230 Science, Ireland). The primers and probes are described in Supplemental Table S1. Viral mRNA  
231 levels were normalized to the expression levels of the cellular housekeeping gene GAPDH.

232

233 **Cytotoxicity Assays.** Confluent cells in 96-well plates were treated with steroid compounds. After  
234 incubation for 24 or 27 h, a cell viability assay was performed using WST reagent (CK12; Dojin Lab,  
235 Japan), according to the manufacturer's instructions.

236

237 **Generation of recombinant MERS-CoV from BAC plasmids.** A BAC clone carrying the full-  
238 length infectious genome of the MERS-CoV EMC2012 strain, pBAC-MERS-wt, was used to generate  
239 recombinant MERS-CoV, as described previously(24, 37) The BAC DNA of SARS-CoV-Rep (38),  
240 kindly provided by Luis Enjuanes, was used as a backbone BAC sequence to generate pBAC-MERS-  
241 wt. The BAC infectious clones carrying amino acid substitutions in nsp15 was generated by  
242 modification of the pBAC-MERS-wt (as a template) using a Red/ET Recombination System Counter-  
243 Selection BAC Modification Kit (Gene Bridges, Heidelberg, Germany). BHK-21 cells were grown in  
244 a single well of a six-well plate in 10% FCS-MEM and transfected with 3 µg of BAC plasmid with  
245 Lipofectamine 3,000 (Thermo Fisher, USA). After transfection, Vero/TMPRSS2 cells were inoculated  
246 to transfected BHK-21 cells. The co-culture was then incubated at 37°C for 3 days. The supernatants  
247 were collected and propagated once using Vero/TMPRSS2 cells. Recovered viruses were stored at  
248 -80°C.

249

250 **Generation of ciclesonide escape mutant.** To obtain ciclesonide escape mutants, virus passage was  
251 repeated at least eight times in the presence of 40 µM ciclesonide. At the first passage, about 10<sup>7</sup> PFU  
252 of virus was inoculated onto 10<sup>6</sup> cells and incubated for 3 h. Next, the cells were washed twice with  
253 culture medium and incubated for 2 days in the presence of ciclesonide. The incubation period was 2  
254 days for the first three passages and 1 day for the following passages. Cells were inoculated with 100  
255 µl culture medium at each successive passage. The amount of replicating virus in the presence of  
256 ciclesonide was quantified using real-time PCR. Vero and VeroE6/TMPSS2 cells were used to passage  
257 MERS-CoV and SARS-CoV-2, respectively.

258

259 **Whole genome sequencing of SARS-CoV-2.** Extracted viral RNA was reverse transcribed and  
260 tagged with index adaptors using the NEBNext Ultra II RNA Library Prep Kit for Illumina (New  
261 England Biolabs, Ipswich, MA, USA), according to the manufacturer's instructions. The resulting  
262 cDNA libraries were verified using the MultiNA System (Shimadzu, Kyoto, Japan) and quantified  
263 using a Quantus Fluorometer (Promega, Madison, WI, USA). Indexed libraries were then converted  
264 and sequenced (150-bp paired-end reads) using the DNBSEQ-G400 (MGI Tech., Shenzhen, China;  
265 operated by GENEWIZ, South Plainfield, NJ, USA). After sequencing, reads with the same index  
266 sequences were grouped. Sequence reads were trimmed by Ktrim (39) and mapped onto the viral  
267 genomes of parental strains using Minimap2 (40). The consensus sequences of the mapped reads were  
268 obtained using ConsensusFixer (Töpfer A. <https://github.com/cbg-ethz/consensusfixer>).

269  
270 **Immunofluorescence Microscopy.** VeroE6/*TMPRSS2* cells cultured on 96 well plates (Lumos  
271 multiwell 96; 94 6120 096; Sarstedt, Germany) were infected with SARS-CoV-2 (WK-521) at an  
272 MOI = 0.1 and incubated for 5 h. Next, the cells were fixed for 30 min at 4°C with 4%  
273 paraformaldehyde in phosphate-buffered saline (PBS). After washing once with PBS, the cells were  
274 permeabilized for 15 min at room temperature (RT) with PBS containing 0.1% Tween-20. The cells  
275 were then incubated with a mixture of rabbit anti-SARS-nsp4 (1:500; ab181620; Abcam, USA) and  
276 mouse anti-dsRNA (1:1000; J2-1709; Scicons, Hungary) antibodies for 1 h at RT, washed three times  
277 with PBS, and incubated for 1 h at RT with a mixture of Alexa Fluor 594 conjugated anti-rabbit IgG  
278 (1:500; A11012; ThermoFisher, USA) and Alexa Fluor 488-conjugated anti-mouse IgG (1:500;  
279 A10680; ThermoFisher, USA). Next, the cells were washed three times with PBS and cell nuclei were  
280 stained with DAPI (1:5000; D1306; ThermoFisher, USA). Cells were observed under an inverted  
281 fluorescence phase contrast microscope (BZ-X810; Keyence, Japan).

282  
283 **Statistical analysis.** Statistical significance was assessed using ANOVAs.  $P < 0.05$  was considered  
284 statistically significant. In figures with error bars, data are presented as the mean  $\pm$  SD.

285

286

## 287 **Acknowledgments**

288 We are most grateful to Tsuneo Morishima (Aichi Medical University) for helpful suggestions. We also  
289 thank Yuriko Tomita, Makoto Kuroda, Tsuyoshi Sekizuka, Ikuyo Takayama, Mina Nakauchi, Kazuya  
290 Nakamura, Tsutomu Kageyama, Kazuhiko Kanou, Kiyoko Okamoto, Naoko Iwata, and Noriyo Nagata  
291 (National Institute of Infectious Diseases) for providing reagents and important information, Ron A. M.  
292 Fouchier and Bart L. Haagmans (Erasmus Medical Center) for providing MERS-CoV, and John Ziebuhr  
293 (University of Wurzburg) for providing SARS-CoV. This study was supported by Grants-in Aid from the  
294 Japan Agency for Medical Research and Development (AMED) (grant number JP19fk0108058j0802 and  
295 20fk0108058j0803), and from the Japan Society for the Promotion of Science (JSPS) (grant number  
296 17K08868 and 20K07519).

297

298

## 299 **References**

- 300 1. Zhu N, Zhang D, Wang W, Li X, Yang B, Song J, Zhao X, Huang B, Shi W, Lu R, Niu P, Zhan F,  
301 Ma X, Wang D, Xu W, Wu G, Gao GF, Tan W. 2020. A novel coronavirus from patients with  
302 pneumonia in China, 2019. *N Engl J Med* 382:727–733.
- 303 2. Lu H. 2020. Drug treatment options for the 2019-new coronavirus (2019- nCoV). *Biosci Trends A*  
304 01020:10–12.
- 305 3. Wang M, Cao R, Zhang L, Yang X, Liu J, Xu M, Shi Z, Hu Z, Zhong W, Xiao G. 2020.  
306 Remdesivir and chloroquine effectively inhibit the recently emerged novel coronavirus (2019-  
307 nCoV) in vitro. *Cell Res* 2019–2021.
- 308 4. Jeon S, Ko M, Lee J, Choi I, Byun SY, Park S, Shum D, Kim S. 2020. Identification of Antiviral  
309 Drug Candidates against SARS-CoV-2 from FDA-Approved Drugs. *Antimicrob Agents Chemother*  
310 64.
- 311 5. Beigel JH, Tomashek KM, Dodd LE, Mehta AK, Zingman BS, Kalil AC, Hohmann E, Chu HY,  
312 Luetkemeyer A, Kline S, Lopez de Castilla D, Finberg RW, Dierberg K, Tapson V, Hsieh L,  
313 Patterson TF, Paredes R, Sweeney DA, Short WR, Touloumi G, Lye DC, Ohmagari N, Oh M,

- 314 Ruiz-Palacios GM, Benfield T, Fätkenheuer G, Kortepeter MG, Atmar RL, Creech CB, Lundgren  
315 J, Babiker AG, Pett S, Neaton JD, Burgess TH, Bonnett T, Green M, Makowski M, Osinusi A,  
316 Nayak S, Lane HC. 2020. Remdesivir for the Treatment of Covid-19 — Preliminary Report. *N*  
317 *Engl J Med*.
- 318 6. Wang Y, Zhang D, Du G, Du R, Zhao J, Jin Y, Fu S, Gao L, Cheng Z, Lu Q, Hu Y, Luo G, Wang  
319 K, Lu Y, Li H, Wang S, Ruan S, Yang C, Mei C, Wang Y, Ding D, Wu F, Tang X, Ye X, Ye Y,  
320 Liu B, Yang J, Yin W, Wang A, Fan G, Zhou F, Liu Z, Gu X, Xu J, Shang L, Zhang Y, Cao L, Guo  
321 T, Wan Y, Qin H, Jiang Y, Jaki T, Hayden FG, Horby PW, Cao B, Wang C. 2020. Remdesivir in  
322 adults with severe COVID-19: a randomised, double-blind, placebo-controlled, multicentre trial.  
323 *Lancet* 395:1569–1578.
- 324 7. Cao B, Wang Y, Wen D, Liu W, Wang J, Fan G, Ruan L, Song B, Cai Y, Wei M, Li X, Xia J, Chen  
325 N, Xiang J, Yu T, Bai T, Xie X, Zhang L, Li C, Yuan Y, Chen H, Li H, Huang H, Tu S, Gong F,  
326 Liu Y, Wei Y, Dong C, Zhou F, Gu X, Xu J, Liu Z, Zhang Y, Li H, Shang L, Wang K, Li K, Zhou  
327 X, Dong X, Qu Z, Lu S, Hu X, Ruan S, Luo S, Wu J, Peng L, Cheng F, Pan L, Zou J, Jia C, Wang  
328 J, Liu X, Wang S, Wu X, Ge Q, He J, Zhan H, Qiu F, Guo L, Huang C, Jaki T, Hayden FG, Horby  
329 PW, Zhang D, Wang C. 2020. A trial of lopinavir-ritonavir in adults hospitalized with severe  
330 covid-19. *N Engl J Med* 382:1787–1799.
- 331 8. WHO discontinues hydroxychloroquine and lopinavir/ritonavir treatment arms for COVID-19.  
332 WHO News release.
- 333 9. Kawashima H, Togashi T, Yamanaka G, Nakajima M, Nagai M, Aritaki K, Kashiwagi Y,  
334 Takekuma K, Hoshika A. 2005. Efficacy of plasma exchange and methylprednisolone pulse  
335 therapy on influenza-associated encephalopathy. *J Infect* 51:E53-6.
- 336 10. Baris HE, Baris S, Karakoc-Aydiner E, Gokce I, Yildiz N, Cicekkoku D, Ogulur I, Ozen A, Alpay  
337 H, Barlan I. 2016. The effect of systemic corticosteroids on the innate and adaptive immune system  
338 in children with steroid responsive nephrotic syndrome. *Eur J Pediatr* 175:685–693.
- 339 11. Coutinho AE, Chapman KE. 2011. The anti-inflammatory and immunosuppressive effects of  
340 glucocorticoids, recent developments and mechanistic insights. *Mol Cell Endocrinol*. Elsevier.

- 341 12. Alfaraj SH, Al-taw A, Assiri AY, Alzahrani NA, Alanazi AA, Memish ZA. 2019. Clinical  
342 predictors of mortality of Middle East Respiratory Syndrome Coronavirus ( MERS-CoV )  
343 infection□: A cohort study. *Travel Med Infect Dis* 29:48–50.
- 344 13. Lee N, Allen Chan KC, Hui DS, Ng EKO, Wu A, Chiu RWK, Wong VWS, Chan PKS, Wong KT,  
345 Wong E, Cockram CS, Tam JS, Sung JJY, Lo YMD. 2004. Effects of early corticosteroid treatment  
346 on plasma SARS-associated Coronavirus RNA concentrations in adult patients. *J Clin Virol*  
347 31:304–309.
- 348 14. Matsuyama S, Kawase M, Nao N, Shirato K, Ujike M, Kamitani W, Shimojima M, Fukushi S.  
349 2020. The inhaled corticosteroid ciclesonide blocks coronavirus RNA replication by targeting viral  
350 NSP15. *bioRxiv*.
- 351 15. Iwabuchi K, Yoshie K, Kurakami Y, Takahashi K, Kato Y, Morishima T. 2020. Therapeutic  
352 potential of ciclesonide inhalation for COVID-19 pneumonia: Report of three cases. *J Infect*  
353 *Chemother* 26:625–632.
- 354 16. Nakajima K, Ogawa F, Sakai K, Uchiyama M, Oyama Y, Kato H, Takeuchi I. 2020. A Case of  
355 Coronavirus Disease 2019 Treated With Ciclesonide. *Mayo Clin Proc*. Elsevier Ltd.
- 356 17. Yamasaki Y, Ooka S, Tsuchida T, Nakamura Y, Hagiwara Y, Naitou Y, Ishibashi Y, Ikeda H,  
357 Sakurada T, Handa H, Nishine H, Takita M, Morikawa D, Yoshida H, Fujii S, Morisawa K,  
358 Takemura H, Fujitani S, Kunishima H. 2020. The peripheral lymphocyte count as a predictor of  
359 severe COVID-19 and the effect of treatment with ciclesonide. *Virus Res*.
- 360 18. Baba H, Kanamori H, Oshima K, Seike I, Niitsuma-Sugaya I, Takei K, Sato Y, Tokuda K, Aoyagi  
361 T. 2020. Prolonged presence of SARS-CoV-2 in a COVID-19 case with rheumatoid arthritis taking  
362 iguratimod treated with ciclesonide. *J Infect Chemother* 20:30213–0.
- 363 19. Kawase M, Shirato K, van der Hoek L, Taguchi F, Matsuyama S. 2012. Simultaneous Treatment of  
364 Human Bronchial Epithelial Cells with Serine and Cysteine Protease Inhibitors Prevents Severe  
365 Acute Respiratory Syndrome Coronavirus Entry. *J Virol* 86:6537–6545.
- 366 20. Nukoolkarn V, Lee VS, Malaisree M, Aruksakulwong O, Hannongbua S. 2008. Molecular dynamic  
367 simulations analysis of ritonavir and lopinavir as SARS-CoV 3CLpro inhibitors. *J Theor Biol*  
368 254:861–867.

- 369 21. Athmer J, Fehr AR, Grunewald M, Smith EC, Denison MR, Perlman S. 2017. In Situ Tagged  
370 nsp15 Reveals Interactions with Coronavirus Associated Proteins. *MBio* 8:1–14.
- 371 22. Deng X, Hackbart M, Mettelman RC, Brien AO, Mielech AM, Yi G. 2017. Coronavirus  
372 nonstructural protein 15 mediates evasion of dsRNA sensors and limits apoptosis in macrophages.  
373 *PNAS* 114:E4251–E4260.
- 374 23. Lundin A, Dijkman R, Bergström T, Kann N, Adamiak B, Hannoun C, Kindler E, Jónsdóttir HR,  
375 Muth D, Kint J, Forlenza M, Müller MA, Drosten C, Thiel V, Trybala E. 2014. Targeting  
376 Membrane-Bound Viral RNA Synthesis Reveals Potent Inhibition of Diverse Coronaviruses  
377 Including the Middle East Respiratory Syndrome Virus. *PLoS Pathog* 10:e1004166.
- 378 24. Terada Y, Kawachi K, Matsuura Y, Kamitani W. 2017. MERS coronavirus nsp1 participates in an  
379 efficient propagation through a specific interaction with viral RNA. *Virology* 511:95–105.
- 380 25. Matsuyama S, Nao N, Shirato K, Kawase M, Saito S, Takayama I, Nagata N, Sekizuka T, Katoh H,  
381 Kato F, Sakata M, Tahara M, Kutsuna S, Ohmagari N, Kuroda M, Suzuki T, Kageyama T, Takeda  
382 M. 2020. Enhanced isolation of SARS-CoV-2 by TMPRSS2-expressing cells. *Proc Natl Acad Sci*  
383 *USA* 117:7001–7003.
- 384 26. Yamamoto N, Matsuyama S, Hoshino T, Yamamoto N. 2020. Nelfinavir inhibits replication of  
385 severe acute respiratory syndrome coronavirus 2 in vitro. *bioRxiv*.
- 386 27. Hagemeyer MC, Monastyrska I, Griffith J, van der Sluijs P, Voortman J, van Bergen en  
387 Henegouwen PM, Vonk AM, Rottier PJM, Reggiori F, De Haan CAM. 2014. Membrane  
388 rearrangements mediated by coronavirus nonstructural proteins 3 and 4. *Virology* 458–459:125–  
389 135.
- 390 28. Sakai Y, Kawachi K, Terada Y, Omori H, Matsuura Y, Wararu K. 2017. Two-amino acids change  
391 in the nsp4 of SARS coronavirus abolishes viral replication. *Virology* 510:165–174.
- 392 29. Lee DKC, Fardon TC, Bates CE, Haggart K, McFarlane LC, Lipworth BJ. 2005. Airway and  
393 systemic effects of hydrofluoroalkane formulations of high-dose ciclesonide and fluticasone in  
394 moderate persistent asthma. *Chest* 127:851–860.
- 395 30. Lipworth BJ, Kaliner MA, LaForce CF, Baker JW, Kaiser HB, Amin D, Kundu S, Williams JE,  
396 Engelstaetter R, Banerji DD. 2005. Effect of ciclesonide and fluticasone on hypothalamic-pituitary-

- 397 adrenal axis function in adults with mild-to-moderate persistent asthma. *Ann Allergy, Asthma*  
398 *Immunol* 94:465–472.
- 399 31. Nave R, Watz H, Hoffmann H, Boss H, Magnussen H. 2010. Deposition and metabolism of inhaled  
400 ciclesonide in the human lung. *Eur Respir J* 36:1113–1119.
- 401 32. Zhang L, Li L, Yan L, Ming Z, Jia Z, Lou Z, Rao Z. 2018. Structural and Biochemical  
402 Characterization of Endoribonuclease Nsp15 Encoded by Middle East Respiratory Syndrome  
403 Coronavirus. *J Virol* 92:1–16.
- 404 33. Kindler E, Gil-Cruz C, Spanier J, Li Y, Wilhelm J, Rabouw HH, Züst R, Hwang M, V'kovski P,  
405 Stalder H, Marti S, Habjan M, Cervantes-Barragan L, Elliot R, Karl N, Gaughan C, van Kuppeveld  
406 FJM, Silverman RH, Keller M, Ludewig B, Bergmann CC, Ziebuhr J, Weiss SR, Kalinke U, Thiel  
407 V. 2017. Early endonuclease-mediated evasion of RNA sensing ensures efficient coronavirus  
408 replication. *PLoS Pathog* 13:1–26.
- 409 34. Kimura H, Kurusu H, Sada M, Kurai D, Murakami K, Kamitani W, Tomita H, Katayama K, Ryo  
410 A. 2020. Molecular pharmacology of ciclesonide against SARS-CoV-2. *J Allergy Clin Immunol*  
411 13:30749–1.
- 412 35. Lei J, Kusov Y, Hilgenfeld R. 2018. Nsp3 of coronaviruses: Structures and functions of a large  
413 multi-domain protein. *Antiviral Res* 149:58–74.
- 414 36. Deng X, Baker SC. 2018. An “Old” protein with a new story: Coronavirus endoribonuclease is  
415 important for evading host antiviral defenses. *Virology*.
- 416 37. Almazán F, Dediego ML, Sola I, Zuñiga S, Nieto-torres JL, Marquez-jurado S, Andrés G. 2013. a  
417 Vaccine Candidate East Respiratory Syndrome Coronavirus as a Vaccine Candidate. *MBio* 4:1–11.
- 418 38. Almazán F, DeDiego ML, Galán C, Escors D, Álvarez E, Ortego J, Sola I, Zuñiga S, Alonso S,  
419 Moreno JL, Nogales A, Capiscol C, Enjuanes L. 2006. Construction of a Severe Acute Respiratory  
420 Syndrome Coronavirus Infectious cDNA Clone and a Replicon To Study Coronavirus RNA  
421 Synthesis. *J Virol* 80:10900–10906.
- 422 39. Sun K. 2020. Ktrim: an extra-fast and accurate adapter- and quality-trimmer for sequencing data.  
423 *Bioinformatics* 36:3561–3562.



424 40. Li H. 2018. Minimap2: pairwise alignment for nucleotide sequences. *Bioinformatics* 34:3094–  
425 3100.  
426  
427

**Table 1. Mutation of ciclesonide escape mutant**

| Coronavirus species and reference sequence | Mutation in viral genome | Amino acid position in ORF1a | Amino acid position in nsp | passage number | Parental strain of mutant                                  |
|--------------------------------------------|--------------------------|------------------------------|----------------------------|----------------|------------------------------------------------------------|
| MERS-CoV-2, NC019843.3                     | C19647T                  | 6457                         | nsp15, A25V                | 11             | EMC/2012                                                   |
| SARS-CoV-2, MN908947.3                     | T7348G                   | 2361                         | nsp3, N1543K               | 8              | DP15-134, DP15-200, DP16-090, DP16-281, DP17-144           |
|                                            | T7348A                   | 2361                         | nsp3, N1543K               | 8              | WK-521                                                     |
|                                            | G8006A                   | 2581                         | nsp3, G1763S               | 8              | DP15-078, DP15-196, DP16-074, DP16-157, DP16-282, DP17-187 |
|                                            | A8010C                   | 2582                         | nsp3, D1764A               | 8              | DP17-243                                                   |
|                                            | G9242A                   | 2994                         | nsp4, E230K                | 8              | DP15-104, DP16-238                                         |

428

429

#### 430 **Figure Legends**

431 **Figure 1. Steroid compounds reduce death rate of MERS-CoV infected cells.** Vero cells seeded in 96-  
432 well microplates were infected with 100 TCID<sub>50</sub> MERS-CoV in the presence of steroid compounds (10  
433 μM). Cytopathic effects were observed at 72 h post-infection. Surviving cells were stained with crystal  
434 violet and photographed and quantified using ImageJ software. Data are presented as the average of two  
435 independent wells. Arrows indicate the steroid compounds assessed further in this study.

436

437 **Figure 2. Steroid compounds suppress replication of MERS-CoV and other viruses.** (a) The effects of  
438 eight steroid compounds on MERS-CoV replication. Vero cells were infected with MERS-CoV at an MOI  
439 of 0.01 in the presence of the indicated steroids for 24 h. The viral titer in the cell supernatant was  
440 quantified in a plaque assay using Vero/*TMPRSS2* cells. Cell viability in the absence of virus was  
441 quantified in a WST assay. (b) The antiviral effects of steroid compounds on various viral species. Cells  
442 were infected with the indicated viruses at an MOI of 0.01 in the presence of DMSO (control) or the  
443 indicated steroids. The viral yield in the cell supernatant was quantified in plaque assay or real-time PCR.  
444 Hep-2 cells were incubated with respiratory syncytial virus A (RSV-A long) for 1 day; MDCK cells were  
445 incubated with influenza H3N2 for 1 day; Vero cells were incubated with rubella virus (TO336) for 7 days;  
446 DBT cells were incubated with murine coronavirus (MHV-2) for 1 day; Vero cells were incubated with

447 MERS-CoV (EMC), SARS-CoV (Frankfurt-1), or SARS-CoV-2 (WK-521) for 1 day; and HeLa229 cells  
448 were incubated with HCoV-229E (VR-740) for 1 day.

449

450 **Figure 3. A ciclesonide-escape mutant of MERS-CoV. (a)** Viral growth of a ciclesonide escape MERS-  
451 CoV mutant. Vero cells treated with 10  $\mu$ M ciclesonide were infected with parental MERS-CoV or the  
452 ciclesonide escape mutant at an MOI of 0.01. The viral titer in the culture medium was quantified at 24 h  
453 post-infection (hpi). **(b)** Viral RNA replication of a ciclesonide escape MERS-CoV mutant. Vero cells  
454 treated with 10  $\mu$ M ciclesonide were infected with parental MERS-CoV or the ciclesonide escape mutant at  
455 an MOI of 1. The viral RNA in the cells was quantified at 6 hpi. E64d (10  $\mu$ M), a virus entry inhibitor, was  
456 used for comparison. **(c)** Growth of the recombinant virus. Vero cells were infected with the parental  
457 MERS-CoV/EMC strain (Re-EMC/MERS) or the recombinant mutant strain (Re-Nsp15-A25V) containing  
458 an amino acid substitution at A25V in NSP15 at an MOI of 0.01 and then treated with the indicated  
459 compounds (10  $\mu$ M). Virus titer was quantified at 24 hpi. **(d)** RNA replication of the recombinant virus.  
460 Vero cells were infected with Re-EMC/MERS or Re-Nsp15-A25V at an MOI of 1 and treated with the  
461 indicated compounds (10  $\mu$ M). The viral RNA in infected cells was quantified at 6 hpi. ND, not detected.  
462 Data are represented as the mean  $\pm$  standard deviation of four independent wells; \*  $P \leq 0.05$ ; and \*\*\*  $P \leq$   
463 0.001.

464

465 **Figure 4. Ciclesonide suppresses replication of SARS-CoV-2 in human bronchial cells. (a, c and e)**  
466 Time course of SARS-CoV-2 propagation. **(b, d and f)** Concentration-dependent effects of ciclesonide.  
467 VeroE6/*TMPRSS2* cells (panels a and b), Calu-3 cells (panels c and d) or HBTE/ALI cells (panels e and f)  
468 were infected with SARS-CoV-2 at an MOI of 0.001 in the presence of DMSO or ciclesonide (10  $\mu$ M) and  
469 then incubated for 1, 3 or 5 days. The virus titer in medium was quantified in a plaque assay using  
470 VeroE6/*TMPRSS2* cells (n=2, in panels a and c); alternatively, the viral RNA in cells or culture medium  
471 was quantified by real-time PCR using the E gene primer/probe set (n=1 in panel e, or n=4 in panel f).  
472 Average of cell viability in the absence of virus was quantified using a WST assay (n=2, in panel b and d).  
473

474 **Figure 5. Steroid compounds and other inhibitors suppress SARS-CoV-2 RNA replication in**  
475 **VeroE6/TMPRSS2 cells.** (a) Time course of SARS-CoV-2 RNA replication. Cells were infected with virus  
476 at an MOI of 1 and cellular RNA was collected at the indicated time points. (b) Inhibition of viral RNA  
477 replication. Cells were infected with SARS-CoV-2 at an MOI of 1 in the presence of the indicated  
478 compounds (10  $\mu$ M) for 6 h. Cellular viral RNA was quantified by real-time PCR using the E gene  
479 primer/probe set. \*\*\*  $P \leq 0.001$ .

480  
481 **Figure 6. A ciclesonide escape mutant of SARS-CoV-2.** (a) Virus replication in the presence of  
482 ciclesonide is due to amino acid substitutions in nsp3 and nsp4. Replication of RNA derived from the 15  
483 mutants listed in Table 1 was assessed in VeroE6/TMPRSS2 cells. Viral RNA was isolated at 6 hpi and  
484 measured by real-time PCR using the E gene primer/probe set. The results were compared with those for  
485 the parental virus in which the viral RNA level after treatment with DMSO was set to 1, and that after  
486 treatment with nelfinavir was set to 1/1000. Relative reductions of viral RNA in the presence of ciclesonide  
487 were plotted at the corresponding mutations in the SARS-CoV-2 genome sequence. The amino acid  
488 substitutions in nsp3 and nsp4 are shown at the bottom of the panel. (b) Topological diagram. The C-  
489 terminal region of nsp3 and full-length nsp4 are depicted on the lipid bilayer of the endoplasmic reticulum  
490 membrane.

491  
492 **Figure 7. Ciclesonide suppresses DMV formation.** VeroE6/TMPRSS2 cells were infected with SARS-  
493 CoV-2 at an MOI of 0.1 in the presence of DMSO or ciclesonide, and then incubated for 5 h. Next, cells  
494 were fixed with 4% paraformaldehyde and permeabilized with 0.1% Tween-20. Nsp3 and double strand  
495 RNA were stained with a rabbit anti-SARS-nsp4 antibody and a mouse anti-dsRNA antibody, followed by  
496 Alexa Fluor 594 conjugated anti-rabbit IgG and Alexa Fluor 488-conjugated anti-mouse IgG. Cell nuclei  
497 were stained with DAPI.

# Fig 1

bioRxiv preprint doi: <https://doi.org/10.1101/2020.08.22.258459>; this version posted August 24, 2020. The copyright holder for this preprint (which was not certified by peer review) is the author/funder. All rights reserved. No reuse allowed without permission.

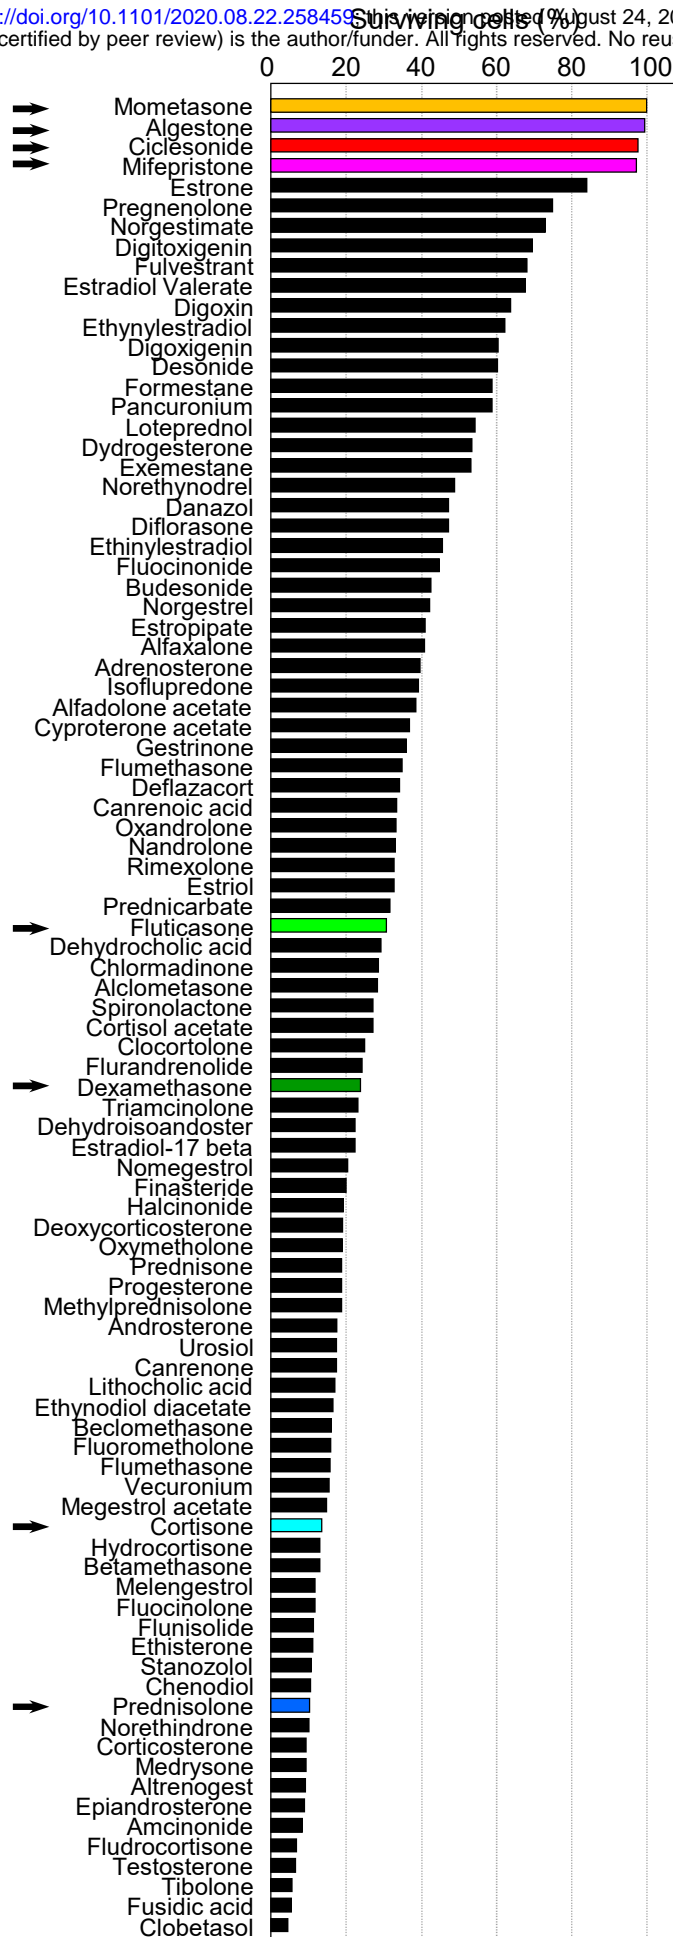

**Fig 2**

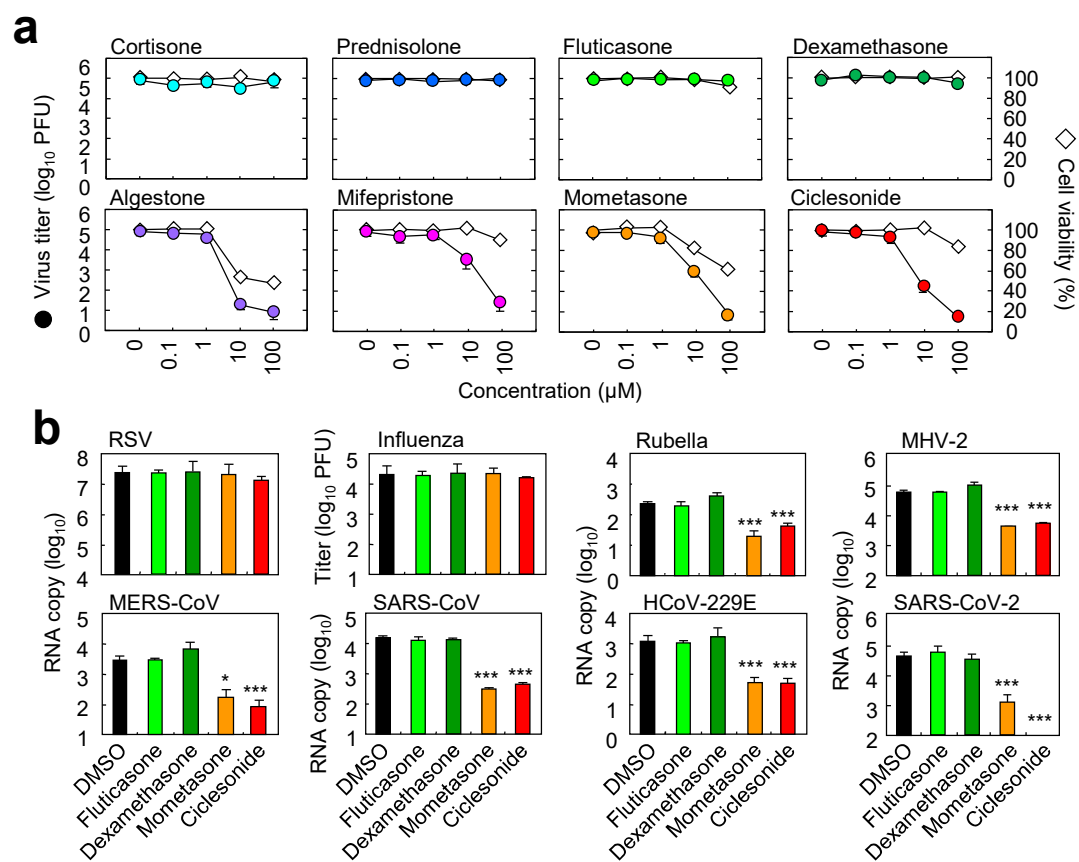

**Fig 3**

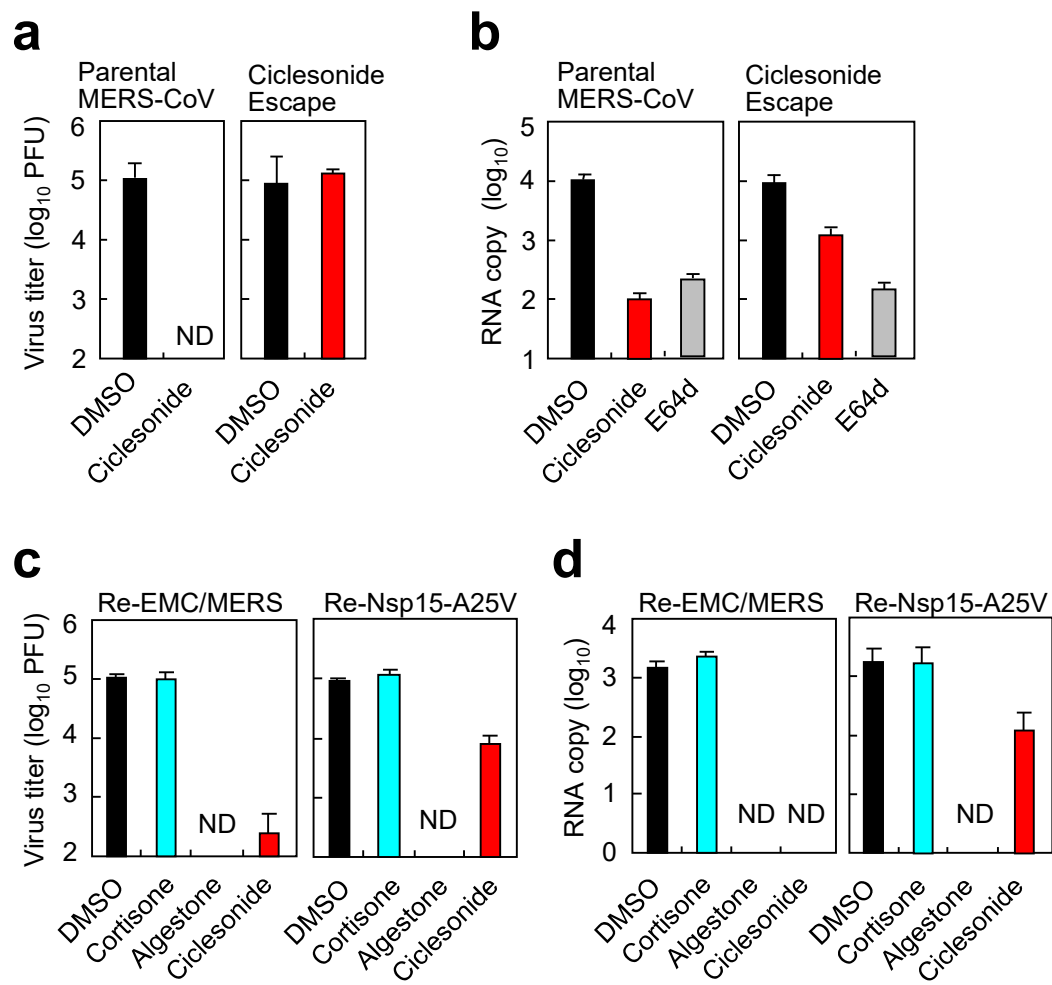

**Fig 4**

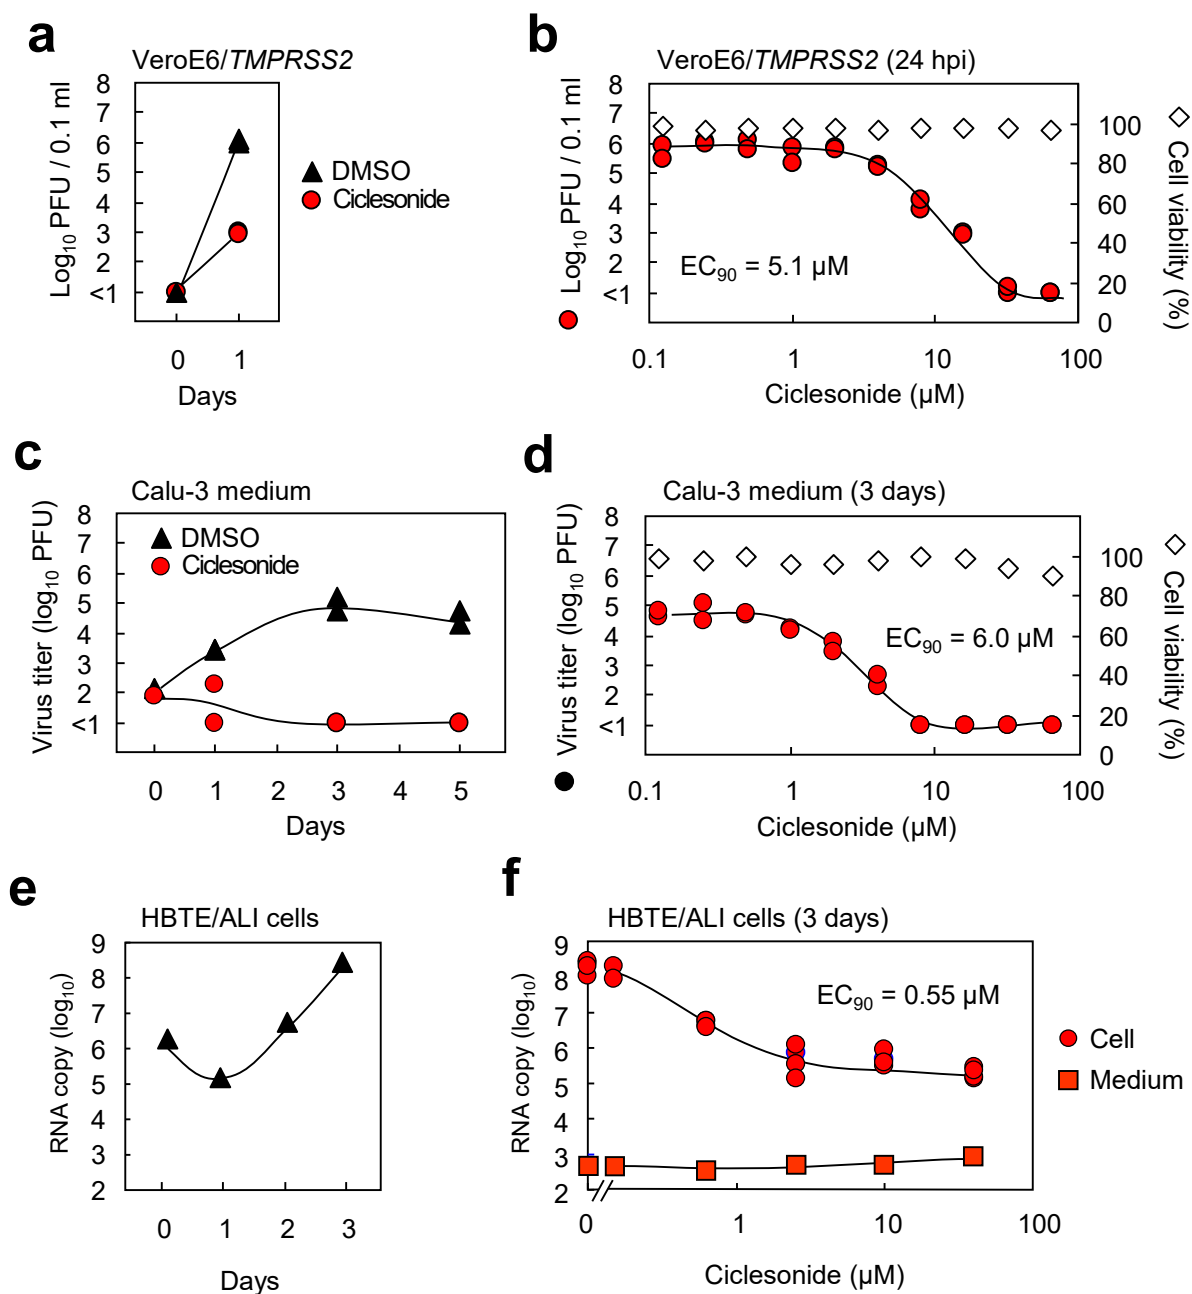



**Fig 5**

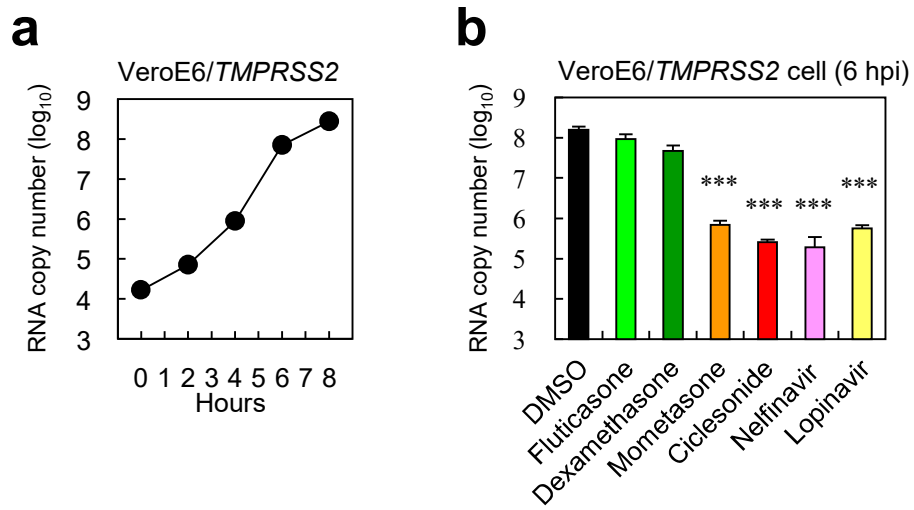

## Fig 6

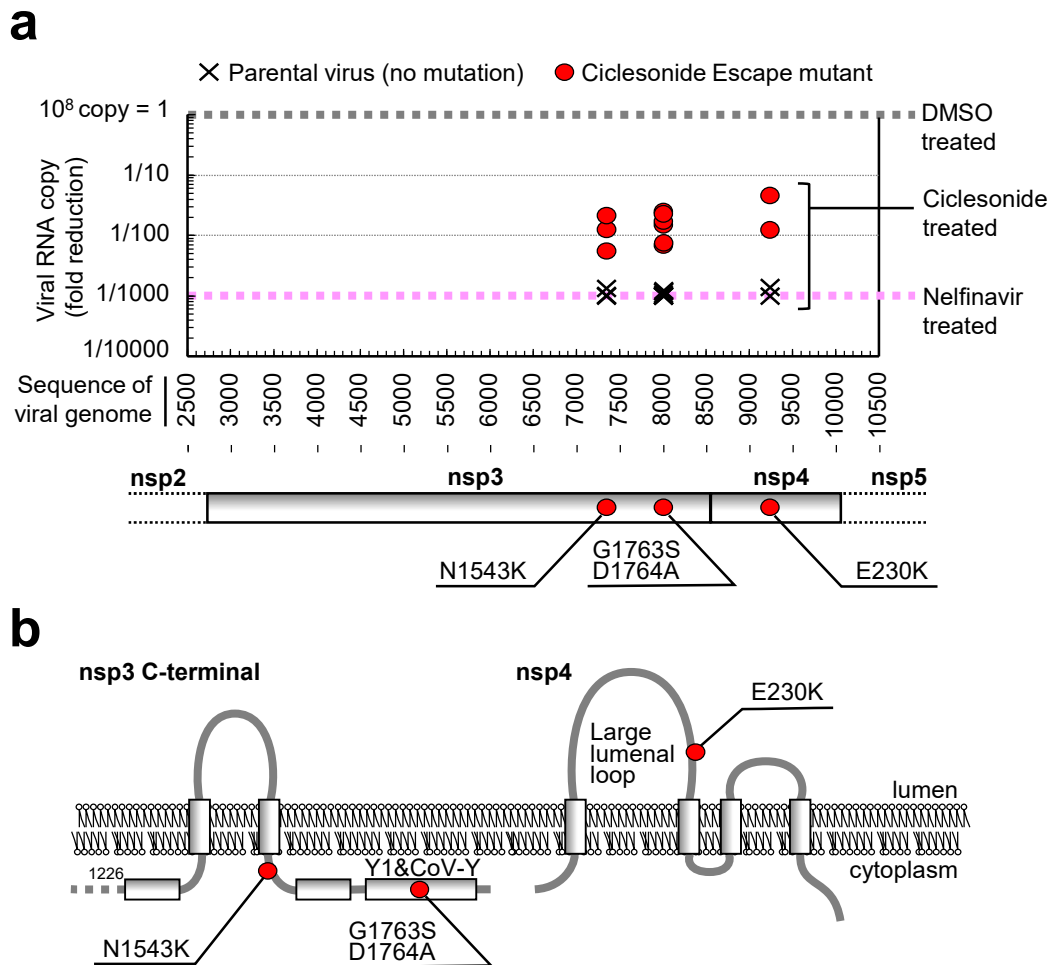

**Fig 7**

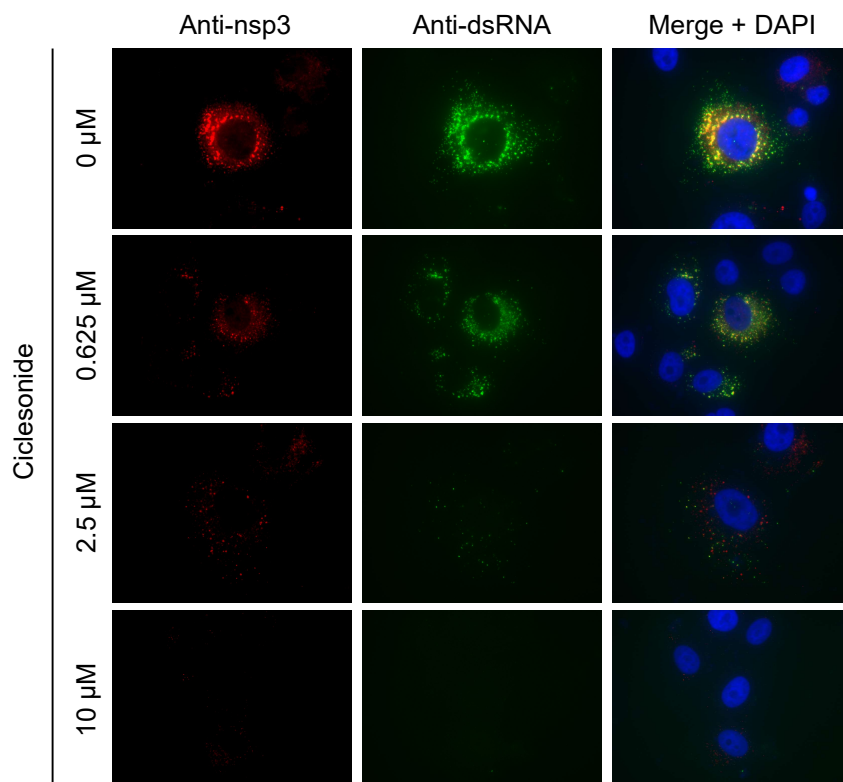

Source: https://www.biorxiv.org/content/10.1101/2020.08.22.258459v1.full.pdf
